# Supplementary material
Source: Springer Nature journal article supplement (https://www.springermedizin.de/resource/supplementary/13020_2008_46_MOESM7_ESM.pdf/9640862)

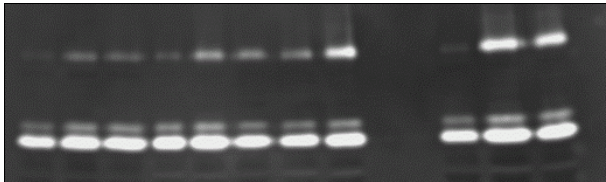

MMP9

MMP2

0 1d 3d 1w 2w 3w 4w 6w

N M FZHY

CCl<sub>4</sub> intoxication time phase

Supplement: MOESM7 [file 9640862]
